# Supplementary material
Source: PubMed Central journal article supplement (PMC3293751)

**Table S1. Real-time PCR primers and probes used in the study**

| <b>Gene name</b> | <b>Forward primer</b>      | <b>Reverse primer</b>       |
|------------------|----------------------------|-----------------------------|
| <b>BZLF1</b>     | 5'-ACGACGCACACGGAAACC-3'   | 5'-CTGGCCCGGCATTTCT-3'      |
| <b>BRLF1</b>     | 5'-TTGGGCCATTCTCCGAAAC-3'  | 5'-TATAGGGCACGCGATGGAA-3'   |
| <b>BMLF1</b>     | 5'-CCCGAACTAGCAGCATTCCT-3' | 5'-GACCGCTTCGAGTCCAGAA-3'   |
| <b>BLNF2a</b>    | 5'-TGGAGCGTGCTTTGCTAGAG-3' | 5'-GGCCTGGTCTCCGTAGAAGAG-3' |
| <b>BALF4</b>     | 5'-CCAGCTTTCCTTCCGAGTCT-3' | 5'-ACACTGGATGTCCGAGGAGAA-3' |

| <b>Gene name</b> | <b>Probe</b>                     |
|------------------|----------------------------------|
| <b>BZLF1</b>     | 5'-GCATTCCTCCAGCGATTCTGGCTGTT-3' |
| <b>BRLF1</b>     | 5'-AGACGGGCTGAGAATGCCGGC-3'      |
| <b>BMLF1</b>     | 5'-AACGAGGATCCCGCAGAGAGCCA-3'    |
| <b>BLNF2a</b>    | 5'-CCTCTGCCTGCGGCCTGCC-3'        |
| <b>BALF4</b>     | 5'-TCCAGCCACGGCGACCTGTTC-3'      |

**Table S2. Applied Biosystems gene expression assays used in the study**

| <b>Gene name</b>                                  | <b>Gene expression assay number</b> |
|---------------------------------------------------|-------------------------------------|
| <b>BCL2A1</b>                                     | Hs00187845_m1                       |
| <b>BCL6</b>                                       | Hs00277037_m1                       |
| <b>CD20</b>                                       | Hs01585412_m1                       |
| <b>CCL22</b>                                      | Hs99999075_m1                       |
| <b>CIITA</b>                                      | Hs00172106_m1                       |
| <b>RFX5</b>                                       | Hs00230841_m1                       |
| <b>HSPA1A</b>                                     | Hs00359163_s1                       |
| <b>BLIMP1 (PRDM1) <math>\alpha</math> isoform</b> | Hs01068508_m1                       |
| <b>IRF4</b>                                       | Hs01056534_m1                       |
| <b>MYC</b>                                        | Hs99999003_m1                       |
| <b>PAX5</b>                                       | Hs00172003_m1                       |
| <b><math>\beta</math>2m</b>                       | 4310886E                            |
| <b>GAPDH</b>                                      | 4310884E                            |

**Figure S1. Differential expression of BLIMP1 target genes in plasma cells, memory cells, or both, compared to centrocytes**

Down-regulated during plasma cell differentiation alone

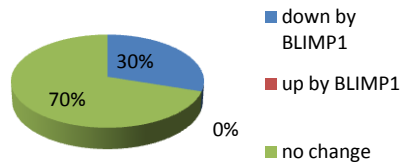

Down-regulated during memory cell differentiation alone

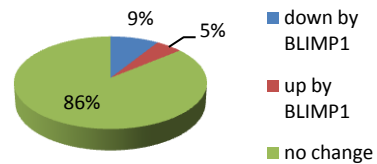

Down-regulated during both plasma and memory cell differentiation

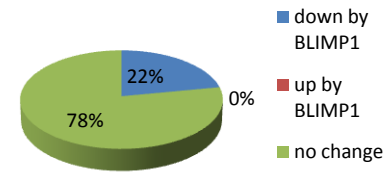

Up-regulated during plasma cell differentiation alone

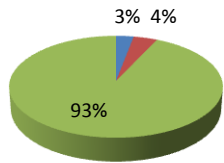

Up-regulated during memory cell differentiation alone

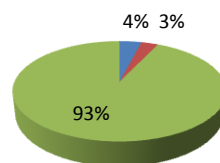

Up-regulated during both plasma and memory cell differentiation

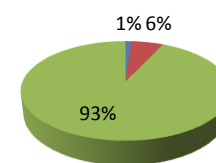

Figure S2. BLIMP1 $\alpha$  and EBV lytic cycle genes are co-expressed in B95.8 cells

A

BLIMP1 $\alpha$  (grey) and VCA (red)

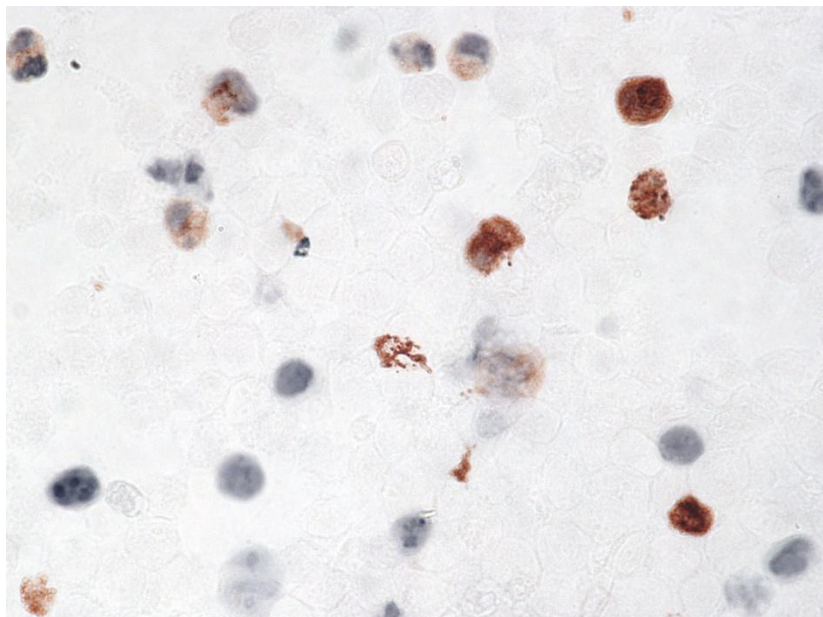

B

BLIMP1 $\alpha$  (grey) and gp350 (red)

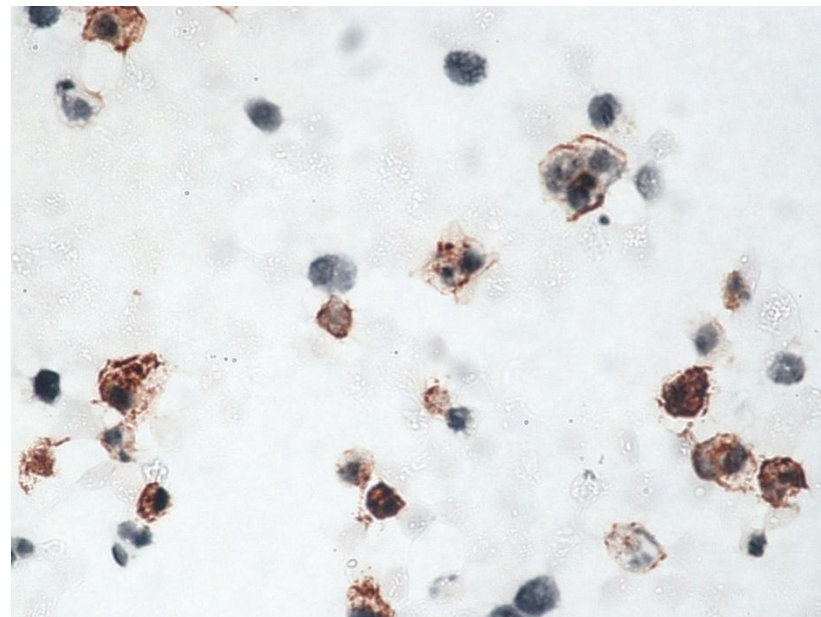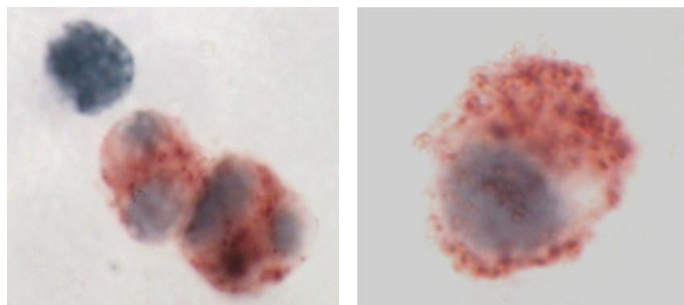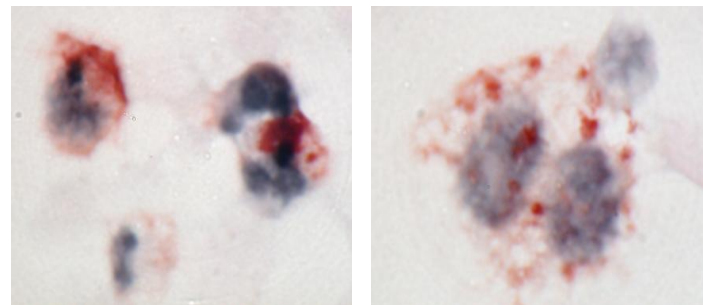

**Figure S3. Viability of LMP1-transfected GC B cells compared with empty vector control-transfected GC B cells**

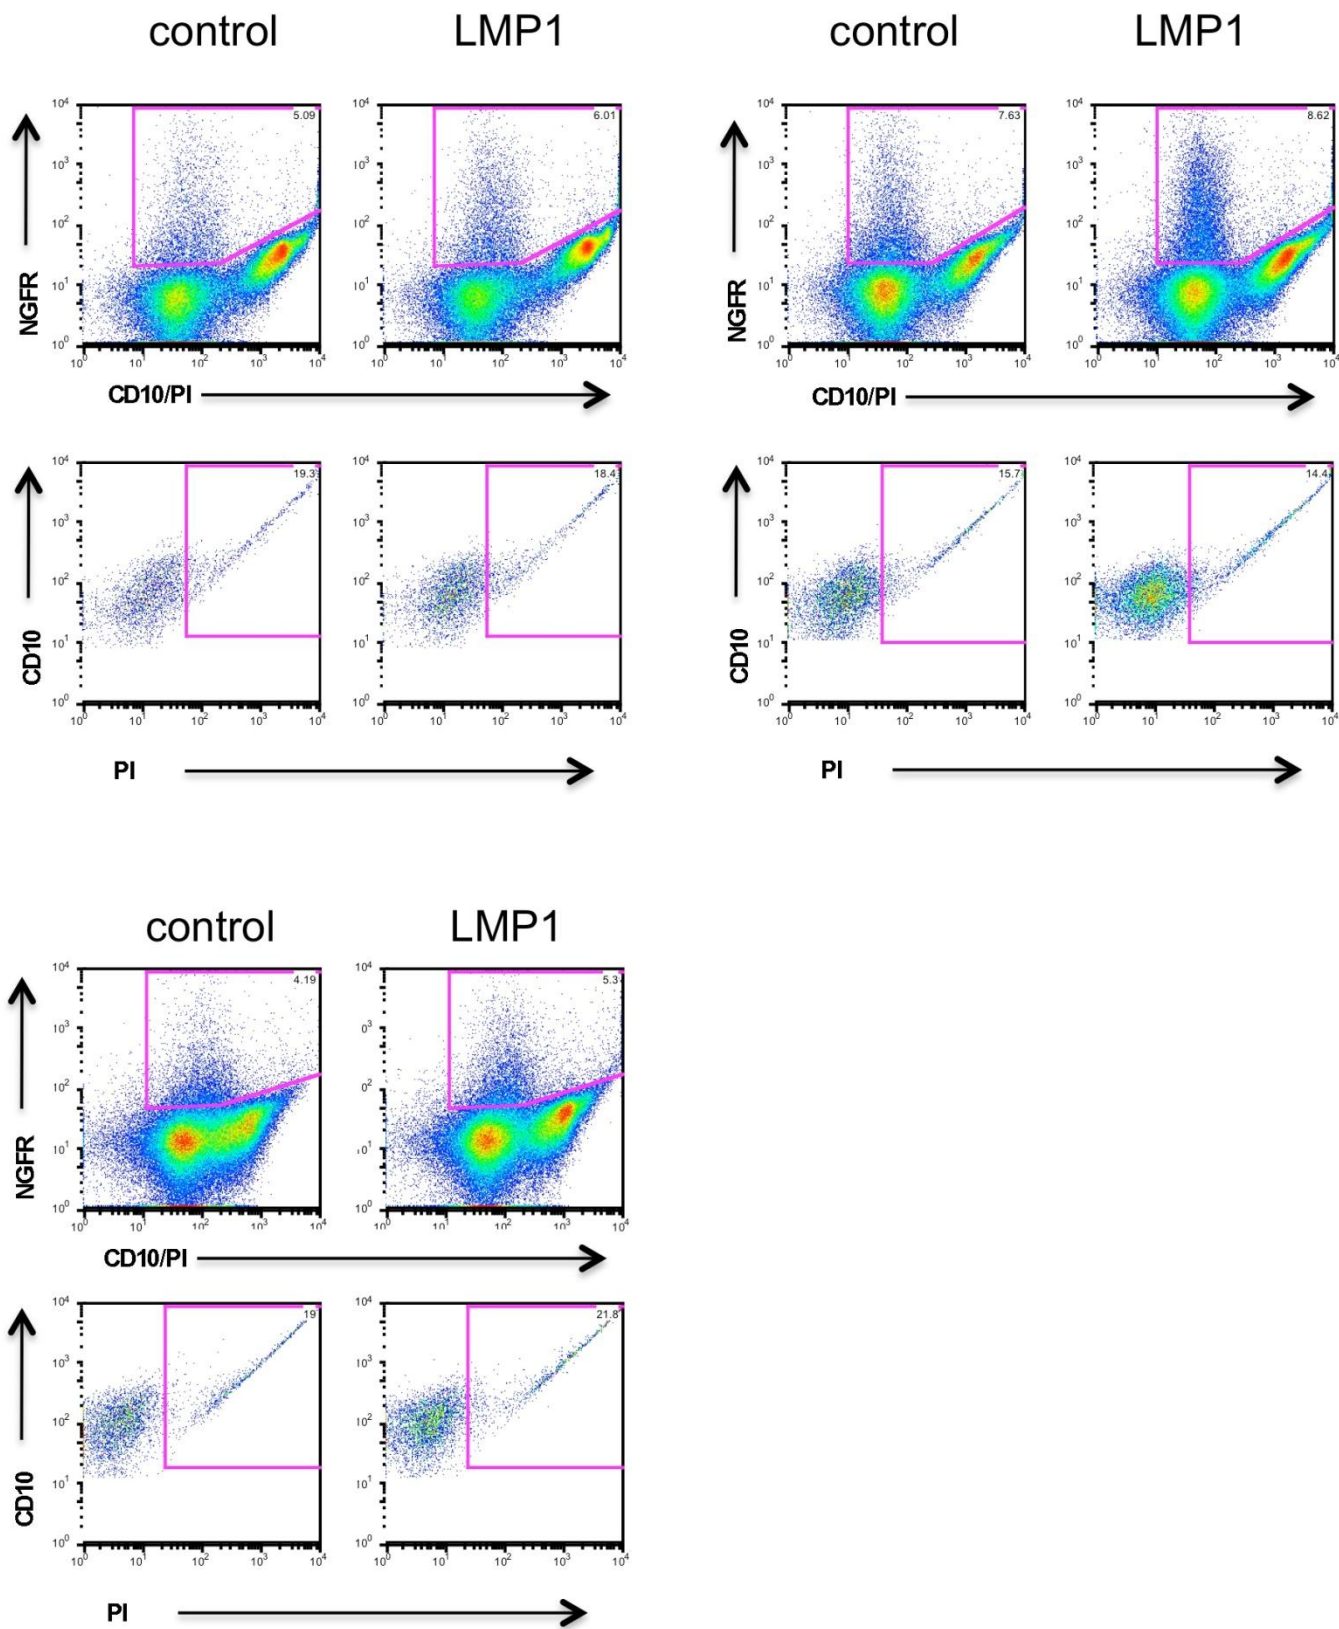

Supplement: supp_blood-2010-09-307710_Document1.pdf [file supp_blood-2010-09-307710_Document1.pdf]
